# Supplementary material
Source: PubMed Central journal article supplement (PMC7331212)
Supplement: ao0c01820_si_001.pdf [file ao0c01820_si_001.pdf]

## **Supporting Information**

### **Synthesis, characterization and crystal structures of two new manganese aceto EMIM ionic compounds with chains of Mn<sup>2+</sup> ions coordinated exclusively by acetate**

**Przemyslaw Dera<sup>1\*</sup>, Edward Bruffey III<sup>2</sup>, Gregory J. Finkelstein<sup>1</sup>, Colleen Kelly<sup>2</sup>, Angelina Gigante<sup>3</sup>, Hans Hagemann<sup>3</sup>, and Godwin Severa<sup>2\*</sup>**

*<sup>1</sup>Hawai'i Institute of Geophysics and Planetology, University of Hawai'i at Mānoa, 1680 East West Rd, POST 109, Honolulu, HI, 96822, USA*

*<sup>2</sup>Hawai'i Natural Energy Institute, University of Hawai'i at Mānoa, 1680 East West Rd, POST 109, Honolulu, HI, 96822, USA*

*<sup>3</sup>Département de Chimie Physique, Université de Genève, 30, quai E. Ansermet, 1211 Geneva 4, Switzerland*

**Table S1.** Hydrogen bond geometry parameters for compound I.

|                     | <b>H...A distance [Å]</b> | <b>D...A distance [Å]</b> | <b>D-H distance [Å]</b> | <b>D-H...A angle [deg]</b> |
|---------------------|---------------------------|---------------------------|-------------------------|----------------------------|
| <u>Aromatic</u>     |                           |                           |                         |                            |
| C4-H4 ... O7        | 2.446(3)                  | 3.309(7)                  | 0.930(6)                | 154.5(4)                   |
| C2-H2 ... O4        | 2.632(4)                  | 3.119(7)                  | 0.930(5)                | 113.3(4)                   |
| C2-H2 ... O5        | 2.377(4)                  | 3.229(7)                  | 0.930(5)                | 152.2(3)                   |
| C3-H3 ... O1        | 2.606(4)                  | 3.076(6)                  | 0.929(5)                | 111.9(3)                   |
| C3-H3 ... O3        | 2.210(4)                  | 3.122(7)                  | 0.929(5)                | 167.0(3)                   |
| C3-H3 ... O7        | 2.843(4)                  | 3.077(6)                  | 0.929(5)                | 95.6(3)                    |
| <u>Ethyl chain</u>  |                           |                           |                         |                            |
| C6-H6A              | no hbonds                 |                           |                         |                            |
| C6-H6B              | no hbonds                 |                           |                         |                            |
| C6-H6C              | no hbonds                 |                           |                         |                            |
| C5-H5AB             | no hbonds                 |                           |                         |                            |
| C5-H5A ... O5       | 2.656(3)                  | 3.545(7)                  | 0.971(6)                | 152.4(4)                   |
| <u>Methyl chain</u> |                           |                           |                         |                            |
| C1-H1A ... O2       | 2.650(4)                  | 3.574(7)                  | 0.960(5)                | 161.7(3)                   |
| C1-H1B ... O1       | 2.799(4)                  | 3.503(6)                  | 0.960(5)                | 130.9(3)                   |
| C1-H1B ... O10_#1   | 2.606(4)                  | 3.488(6)                  | 0.960(5)                | 152.9(3)                   |
| C1-H1C ... O6       | 2.694(5)                  | 3.503(7)                  | 0.960(5)                | 142.4(3)                   |
| C1-H1C ... O8       | 2.831(4)                  | 3.640(6)                  | 0.960(5)                | 142.5(3)                   |

Atom symmetry transformation codes from original coordinates:

#1: 0.5-x, -0.5+y, 0.5-z

**Table S2.** Hydrogen bond geometry parameters for compound **II**.

|                                    | <b>H...A distance [Å]</b> | <b>D...A distance [Å]</b> | <b>D-H distance [Å]</b> | <b>D-H...A angle [deg]</b> |
|------------------------------------|---------------------------|---------------------------|-------------------------|----------------------------|
| <u>EMIM aromatic hydrogens</u>     |                           |                           |                         |                            |
| C10-H10 ... O2                     | 2.725(7)                  | 3.495(10)                 | 0.930(3)                | 140.70(2)                  |
| C10-H10 ... O7                     | 2.671(7)                  | 3.088(8)                  | 0.930(3)                | 108.04(2)                  |
| C10-H10 ... O9                     | 2.577(9)                  | 3.396(14)                 | 0.930(3)                | 147.08(2)                  |
| C10-H10 ... O10                    | 2.764(8)                  | 3.165(11)                 | 0.930(3)                | 107.05(1)                  |
| C11-H11 ... O4                     | 2.606(8)                  | 3.197(7)                  | 0.930(2)                | 121.95(2)                  |
| C11-H11 ... O3                     | 2.880(6)                  | 3.610(8)                  | 0.930(2)                | 136.27(2)                  |
| C12-H12 ... O1                     | 2.435(8)                  | 3.344(11)                 | 0.929(3)                | 165.82(2)                  |
| <u>EMIM ethyl chain hydrogens</u>  |                           |                           |                         |                            |
| C16-H16A                           | no hbonds                 |                           |                         |                            |
| C16-H16B                           | no hbonds                 |                           |                         |                            |
| C16-H16C                           | no hbonds                 |                           |                         |                            |
| C15-H5AB                           | no hbonds                 |                           |                         |                            |
| C15-H15A ... O2                    | 2.619(12)                 | 3.475(15)                 | 0.970(3)                | 147.26(2)                  |
| <u>EMIM methyl chain hydrogens</u> |                           |                           |                         |                            |
| C9-H9A ... O9                      | 2.850(5)                  | 3.511(10)                 | 0.960(4)                | 126.85(2)                  |
| C9-H9B ... O4                      | 2.589(8)                  | 3.432(8)                  | 0.960(1)                | 146.59(2)                  |
| C9-H9B ... O11                     | 2.852(9)                  | 3.678(10)                 | 0.960(1)                | 144.66(2)                  |
| C9-H9C ... O5                      | 2.685(7)                  | 3.471(9)                  | 0.960(2)                | 139.53(2)                  |

**Table S3.** Crystal data and structure refinement for compound I.

|                                                        |                                                                                                |
|--------------------------------------------------------|------------------------------------------------------------------------------------------------|
| Identification code                                    | Compound I                                                                                     |
| Empirical formula                                      | C16 H26 Mn2 N2 O10                                                                             |
| Formula weight                                         | 516.27                                                                                         |
| Temperature                                            | 373(2) K                                                                                       |
| Wavelength                                             | 0.56086 Å                                                                                      |
| Crystal system, space group                            | Monoclinic, P 21/n                                                                             |
| Unit cell dimensions<br>deg.<br>92.724(2) deg.<br>deg. | a = 12.2690(8) Å    alpha = 90<br>b = 9.2890(7) Å    beta =<br>c = 21.0005(16) Å    gamma = 90 |
| Volume                                                 | 2390.7(3) Å <sup>3</sup>                                                                       |
| Z, Calculated density                                  | 4, 1.434 Mg/m <sup>3</sup>                                                                     |
| Absorption coefficient                                 | 0.576 mm <sup>-1</sup>                                                                         |
| F(000)                                                 | 1064                                                                                           |
| Crystal size                                           | ? x ? x ? mm                                                                                   |
| Theta range for data collection                        | 2.281 to 20.018 deg.                                                                           |
| Limiting indices                                       | -14<=h<=14, -9<=k<=10, -25<=l<=25                                                              |
| Reflections collected / unique                         | 19549 / 3645 [R(int) = 0.0595]                                                                 |
| Completeness to theta = 19.665                         | 83.5 %                                                                                         |
| Refinement method                                      | Full-matrix least-squares on F <sup>2</sup>                                                    |
| Data / restraints / parameters                         | 3645 / 251 / 292                                                                               |
| Goodness-of-fit on F <sup>2</sup>                      | 1.116                                                                                          |
| Final R indices [I>2sigma(I)]                          | R1 = 0.0532, wR2 = 0.1036                                                                      |
| R indices (all data)                                   | R1 = 0.0707, wR2 = 0.1095                                                                      |
| Largest diff. peak and hole                            | 0.647 and -0.458 e.Å <sup>-3</sup>                                                             |

**Table S4.** Atomic coordinates ( $\times 10^4$ ) and equivalent isotropic displacement parameters ( $\text{\AA}^2 \times 10^3$ ) for compound I. U(eq) is defined as one third of the trace of the orthogonalized  $U_{ij}$  tensor.

|        | x        | y        | z        | U(eq)  |
|--------|----------|----------|----------|--------|
| Mn(1)  | 5000     | 5000     | 5000     | 19(1)  |
| Mn(2)  | 2355(1)  | 3453(1)  | 4318(1)  | 23(1)  |
| Mn(3)  | 0        | 5000     | 5000     | 24(1)  |
| O(1)   | 4869(3)  | 2831(4)  | 5325(2)  | 28(1)  |
| O(2)   | 3227(3)  | 2036(4)  | 4986(2)  | 30(1)  |
| O(3)   | 4085(3)  | 4371(4)  | 4110(1)  | 23(1)  |
| O(4)   | 3372(3)  | 2608(4)  | 3532(2)  | 30(1)  |
| O(5)   | 1129(3)  | 1889(4)  | 4133(2)  | 31(1)  |
| O(6)   | -266(3)  | 2866(5)  | 4608(2)  | 47(1)  |
| O(7)   | 1654(3)  | 4916(4)  | 3610(2)  | 30(1)  |
| O(8)   | 276(3)   | 5920(4)  | 4099(2)  | 39(1)  |
| O(9)   | 1790(3)  | 4654(4)  | 5111(2)  | 28(1)  |
| O(10)  | 3434(3)  | 5469(4)  | 5398(2)  | 31(1)  |
| N(1)   | 3433(3)  | 7721(5)  | 3007(2)  | 28(1)  |
| N(2)   | 2763(3)  | 8423(5)  | 3881(2)  | 25(1)  |
| C(1)   | 2445(4)  | 8453(6)  | 4544(2)  | 35(1)  |
| C(2)   | 2515(4)  | 9451(6)  | 3432(2)  | 34(1)  |
| C(3)   | 3318(4)  | 7394(6)  | 3617(2)  | 27(1)  |
| C(4)   | 2931(4)  | 9011(6)  | 2883(3)  | 35(1)  |
| C(5)   | 4061(5)  | 6897(7)  | 2556(3)  | 45(2)  |
| C(6)   | 5255(5)  | 7288(9)  | 2615(4)  | 79(3)  |
| C(7)   | 522(5)   | 6611(6)  | 3052(2)  | 38(1)  |
| C(8)   | 849(4)   | 5745(6)  | 3633(2)  | 24(1)  |
| C(9)   | -502(5)  | 570(7)   | 4140(3)  | 47(2)  |
| C(10)  | 172(4)   | 1875(6)  | 4310(2)  | 30(1)  |
| C(11)  | 5243(5)  | 3094(9)  | 3421(3)  | 62(2)  |
| C(12)  | 4166(4)  | 3357(6)  | 3697(2)  | 27(1)  |
| C(13)  | 4265(5)  | 612(6)   | 5725(3)  | 38(1)  |
| C(14)  | 4101(4)  | 1943(6)  | 5312(2)  | 25(1)  |
| C(15)  | 2490(4)  | 5139(7)  | 5524(2)  | 32(1)  |
| C(16A) | 2080(30) | 5720(90) | 6167(18) | 83(12) |
| C(16B) | 2180(20) | 5050(40) | 6205(12) | 36(6)  |

**Table S5.** Bond lengths [Å] and angles [deg] for compound I.

---

|                             |             |
|-----------------------------|-------------|
| Mn (1) -O (1) #1            | 2.136 (3)   |
| Mn (1) -O (1)               | 2.136 (3)   |
| Mn (1) -O (10)              | 2.176 (3)   |
| Mn (1) -O (10) #1           | 2.176 (3)   |
| Mn (1) -O (3)               | 2.213 (3)   |
| Mn (1) -O (3) #1            | 2.213 (3)   |
| Mn (2) -O (5)               | 2.114 (4)   |
| Mn (2) -O (9)               | 2.147 (3)   |
| Mn (2) -O (7)               | 2.162 (3)   |
| Mn (2) -O (2)               | 2.168 (3)   |
| Mn (2) -O (4)               | 2.257 (3)   |
| Mn (2) -O (3)               | 2.347 (3)   |
| Mn (2) -C (12)              | 2.630 (5)   |
| Mn (3) -O (8) #2            | 2.118 (3)   |
| Mn (3) -O (8)               | 2.118 (3)   |
| Mn (3) -O (6)               | 2.165 (4)   |
| Mn (3) -O (6) #2            | 2.165 (4)   |
| Mn (3) -O (9)               | 2.221 (3)   |
| Mn (3) -O (9) #2            | 2.221 (3)   |
| O (1) -C (14)               | 1.251 (6)   |
| O (2) -C (14)               | 1.248 (6)   |
| O (3) -C (12)               | 1.287 (6)   |
| O (4) -C (12)               | 1.234 (6)   |
| O (5) -C (10)               | 1.249 (6)   |
| O (6) -C (10)               | 1.248 (6)   |
| O (7) -C (8)                | 1.255 (6)   |
| O (8) -C (8)                | 1.242 (6)   |
| O (9) -C (15)               | 1.273 (6)   |
| O (10) -C (15)              | 1.238 (6)   |
| N (1) -C (3)                | 1.331 (6)   |
| N (1) -C (4)                | 1.367 (7)   |
| N (1) -C (5)                | 1.465 (7)   |
| N (2) -C (3)                | 1.311 (6)   |
| N (2) -C (2)                | 1.366 (6)   |
| N (2) -C (1)                | 1.464 (6)   |
| C (2) -C (4)                | 1.345 (7)   |
| C (5) -C (6)                | 1.509 (9)   |
| C (7) -C (8)                | 1.500 (7)   |
| C (9) -C (10)               | 1.501 (7)   |
| C (11) -C (12)              | 1.488 (7)   |
| C (13) -C (14)              | 1.518 (7)   |
| C (15) -C (16B)             | 1.50 (3)    |
| C (15) -C (16A)             | 1.56 (3)    |
| O (1) #1 -Mn (1) -O (1)     | 180.0       |
| O (1) #1 -Mn (1) -O (10)    | 90.86 (14)  |
| O (1) -Mn (1) -O (10)       | 89.14 (14)  |
| O (1) #1 -Mn (1) -O (10) #1 | 89.14 (14)  |
| O (1) -Mn (1) -O (10) #1    | 90.86 (14)  |
| O (10) -Mn (1) -O (10) #1   | 180.00 (19) |
| O (1) #1 -Mn (1) -O (3)     | 91.27 (12)  |

|                            |             |
|----------------------------|-------------|
| O (1) -Mn (1) -O (3)       | 88.73 (12)  |
| O (10) -Mn (1) -O (3)      | 87.44 (12)  |
| O (10) #1-Mn (1) -O (3)    | 92.55 (12)  |
| O (1) #1-Mn (1) -O (3) #1  | 88.73 (12)  |
| O (1) -Mn (1) -O (3) #1    | 91.27 (12)  |
| O (10) -Mn (1) -O (3) #1   | 92.56 (12)  |
| O (10) #1-Mn (1) -O (3) #1 | 87.45 (12)  |
| O (3) -Mn (1) -O (3) #1    | 180.00 (19) |
| O (5) -Mn (2) -O (9)       | 104.27 (13) |
| O (5) -Mn (2) -O (7)       | 92.82 (14)  |
| O (9) -Mn (2) -O (7)       | 94.24 (13)  |
| O (5) -Mn (2) -O (2)       | 91.51 (13)  |
| O (9) -Mn (2) -O (2)       | 88.93 (13)  |
| O (7) -Mn (2) -O (2)       | 173.83 (13) |
| O (5) -Mn (2) -O (4)       | 92.28 (13)  |
| O (9) -Mn (2) -O (4)       | 163.40 (13) |
| O (7) -Mn (2) -O (4)       | 86.06 (13)  |
| O (2) -Mn (2) -O (4)       | 89.38 (13)  |
| O (5) -Mn (2) -O (3)       | 149.01 (12) |
| O (9) -Mn (2) -O (3)       | 106.48 (12) |
| O (7) -Mn (2) -O (3)       | 88.72 (12)  |
| O (2) -Mn (2) -O (3)       | 85.31 (12)  |
| O (4) -Mn (2) -O (3)       | 56.92 (12)  |
| O (5) -Mn (2) -C (12)      | 119.75 (15) |
| O (9) -Mn (2) -C (12)      | 135.52 (15) |
| O (7) -Mn (2) -C (12)      | 89.90 (15)  |
| O (2) -Mn (2) -C (12)      | 84.14 (15)  |
| O (4) -Mn (2) -C (12)      | 27.94 (14)  |
| O (3) -Mn (2) -C (12)      | 29.26 (14)  |
| O (8) #2-Mn (3) -O (8)     | 180.0       |
| O (8) #2-Mn (3) -O (6)     | 86.70 (16)  |
| O (8) -Mn (3) -O (6)       | 93.30 (16)  |
| O (8) #2-Mn (3) -O (6) #2  | 93.30 (16)  |
| O (8) -Mn (3) -O (6) #2    | 86.70 (16)  |
| O (6) -Mn (3) -O (6) #2    | 180.0       |
| O (8) #2-Mn (3) -O (9)     | 92.73 (13)  |
| O (8) -Mn (3) -O (9)       | 87.27 (13)  |
| O (6) -Mn (3) -O (9)       | 92.16 (14)  |
| O (6) #2-Mn (3) -O (9)     | 87.84 (14)  |
| O (8) #2-Mn (3) -O (9) #2  | 87.27 (13)  |
| O (8) -Mn (3) -O (9) #2    | 92.72 (13)  |
| O (6) -Mn (3) -O (9) #2    | 87.84 (14)  |
| O (6) #2-Mn (3) -O (9) #2  | 92.16 (14)  |
| O (9) -Mn (3) -O (9) #2    | 180.0       |
| C (14) -O (1) -Mn (1)      | 133.1 (3)   |
| C (14) -O (2) -Mn (2)      | 141.4 (3)   |
| C (12) -O (3) -Mn (1)      | 135.3 (3)   |
| C (12) -O (3) -Mn (2)      | 87.7 (3)    |
| Mn (1) -O (3) -Mn (2)      | 111.44 (13) |
| C (12) -O (4) -Mn (2)      | 93.1 (3)    |
| C (10) -O (5) -Mn (2)      | 128.6 (3)   |
| C (10) -O (6) -Mn (3)      | 143.6 (3)   |
| C (8) -O (7) -Mn (2)       | 130.4 (3)   |
| C (8) -O (8) -Mn (3)       | 140.5 (4)   |

|                         |             |
|-------------------------|-------------|
| C (15) -O (9) -Mn (2)   | 118.7 (3)   |
| C (15) -O (9) -Mn (3)   | 130.7 (3)   |
| Mn (2) -O (9) -Mn (3)   | 110.37 (14) |
| C (15) -O (10) -Mn (1)  | 152.1 (4)   |
| C (3) -N (1) -C (4)     | 108.3 (4)   |
| C (3) -N (1) -C (5)     | 125.9 (5)   |
| C (4) -N (1) -C (5)     | 125.6 (5)   |
| C (3) -N (2) -C (2)     | 108.7 (4)   |
| C (3) -N (2) -C (1)     | 125.7 (4)   |
| C (2) -N (2) -C (1)     | 125.6 (4)   |
| C (4) -C (2) -N (2)     | 107.3 (5)   |
| N (2) -C (3) -N (1)     | 108.8 (4)   |
| C (2) -C (4) -N (1)     | 106.9 (5)   |
| N (1) -C (5) -C (6)     | 111.0 (5)   |
| O (8) -C (8) -O (7)     | 125.8 (5)   |
| O (8) -C (8) -C (7)     | 115.6 (5)   |
| O (7) -C (8) -C (7)     | 118.6 (4)   |
| O (6) -C (10) -O (5)    | 125.1 (5)   |
| O (6) -C (10) -C (9)    | 118.0 (5)   |
| O (5) -C (10) -C (9)    | 116.9 (5)   |
| O (4) -C (12) -O (3)    | 121.2 (4)   |
| O (4) -C (12) -C (11)   | 120.1 (5)   |
| O (3) -C (12) -C (11)   | 118.7 (5)   |
| O (4) -C (12) -Mn (2)   | 59.0 (2)    |
| O (3) -C (12) -Mn (2)   | 63.1 (2)    |
| C (11) -C (12) -Mn (2)  | 170.1 (5)   |
| O (2) -C (14) -O (1)    | 126.4 (5)   |
| O (2) -C (14) -C (13)   | 117.1 (5)   |
| O (1) -C (14) -C (13)   | 116.5 (4)   |
| O (10) -C (15) -O (9)   | 123.4 (4)   |
| O (10) -C (15) -C (16B) | 120.0 (10)  |
| O (9) -C (15) -C (16B)  | 115.9 (10)  |
| O (10) -C (15) -C (16A) | 116.1 (17)  |
| O (9) -C (15) -C (16A)  | 118.6 (14)  |

---

Symmetry transformations used to generate equivalent atoms:  
#1 -x+1,-y+1,-z+1      #2 -x,-y+1,-z+1



**Table S6.** Anisotropic displacement parameters ( $\text{Å}^2 \times 10^3$ ) for compound I.

The anisotropic displacement factor exponent takes the form:

$$-2 \pi^2 [ h^2 a^2 U_{11} + \dots + 2 h k a^* b^* U_{12} ]$$

|        | U11    | U22     | U33    | U23     | U13    | U12    |
|--------|--------|---------|--------|---------|--------|--------|
| Mn(1)  | 18(1)  | 22(1)   | 17(1)  | -1(1)   | 0(1)   | 3(1)   |
| Mn(2)  | 19(1)  | 30(1)   | 20(1)  | 0(1)    | 2(1)   | 5(1)   |
| Mn(3)  | 15(1)  | 39(1)   | 18(1)  | -2(1)   | 2(1)   | 5(1)   |
| O(1)   | 27(2)  | 25(2)   | 32(2)  | 5(2)    | -7(2)  | -2(2)  |
| O(2)   | 22(2)  | 32(2)   | 35(2)  | 9(2)    | -5(2)  | 2(2)   |
| O(3)   | 27(2)  | 23(2)   | 18(2)  | -2(2)   | -2(1)  | 2(2)   |
| O(4)   | 22(2)  | 35(2)   | 34(2)  | -13(2)  | 5(2)   | -5(2)  |
| O(5)   | 20(2)  | 36(2)   | 37(2)  | -6(2)   | 4(2)   | 1(2)   |
| O(6)   | 30(2)  | 49(3)   | 62(3)  | -25(2)  | 16(2)  | -5(2)  |
| O(7)   | 31(2)  | 37(2)   | 22(2)  | 4(2)    | 1(2)   | 11(2)  |
| O(8)   | 31(2)  | 61(3)   | 24(2)  | 11(2)   | 6(2)   | 13(2)  |
| O(9)   | 17(2)  | 46(2)   | 22(2)  | -5(2)   | -1(1)  | 7(2)   |
| O(10)  | 20(2)  | 43(2)   | 31(2)  | -10(2)  | 6(2)   | 1(2)   |
| N(1)   | 29(2)  | 28(3)   | 28(2)  | -1(2)   | -3(2)  | -1(2)  |
| N(2)   | 26(2)  | 23(2)   | 26(2)  | 5(2)    | 0(2)   | 0(2)   |
| C(1)   | 43(3)  | 36(3)   | 26(3)  | 0(3)    | 3(2)   | -2(3)  |
| C(2)   | 41(3)  | 24(3)   | 36(3)  | 7(2)    | 3(3)   | 5(2)   |
| C(3)   | 30(3)  | 21(3)   | 29(3)  | -1(2)   | -11(2) | -1(2)  |
| C(4)   | 43(3)  | 35(3)   | 25(3)  | 7(2)    | 0(3)   | -1(3)  |
| C(5)   | 48(4)  | 50(4)   | 35(3)  | -14(3)  | -2(3)  | 6(3)   |
| C(6)   | 47(4)  | 105(7)  | 86(6)  | -52(5)  | 24(4)  | 4(4)   |
| C(7)   | 40(3)  | 43(4)   | 31(3)  | 15(3)   | 4(2)   | 11(3)  |
| C(8)   | 24(3)  | 28(3)   | 19(2)  | 1(2)    | 2(2)   | -1(2)  |
| C(9)   | 43(4)  | 54(4)   | 44(4)  | -13(3)  | 17(3)  | -18(3) |
| C(10)  | 29(3)  | 34(3)   | 26(3)  | -3(2)   | 2(2)   | -1(2)  |
| C(11)  | 35(3)  | 112(6)  | 42(4)  | -49(4)  | 13(3)  | -16(4) |
| C(12)  | 24(3)  | 39(3)   | 19(2)  | -5(2)   | 2(2)   | 0(2)   |
| C(13)  | 44(4)  | 28(3)   | 41(3)  | 14(3)   | -14(3) | -6(3)  |
| C(14)  | 25(3)  | 25(3)   | 26(3)  | -1(2)   | 3(2)   | 4(2)   |
| C(15)  | 20(3)  | 52(4)   | 22(3)  | -4(3)   | -2(2)  | 9(3)   |
| C(16A) | 34(10) | 190(40) | 28(12) | -42(18) | 0(8)   |        |
| 20(20) |        |         |        |         |        |        |
| C(16B) | 12(7)  | 77(16)  | 18(5)  | -6(9)   | -4(5)  | 0(8)   |

**Table S7.** Crystal data and structure refinement for compound\_ii.

|                                        |                                             |
|----------------------------------------|---------------------------------------------|
| Identification code                    | compound II                                 |
| Empirical formula                      | C16 H28 Mn2 N2 O11                          |
| Formula weight                         | 534.28                                      |
| Temperature                            | 573(2) K                                    |
| Wavelength                             | 0.56086 Å                                   |
| Crystal system, space group            | Triclinic, P -1                             |
| Unit cell dimensions<br>70.170(5) deg. | a = 9.362(2) Å    alpha =                   |
| 87.581(5) deg.                         | b = 10.820(3) Å    beta =                   |
| 79.631(6) deg.                         | c = 12.659(3) Å    gamma =                  |
| Volume                                 | 1186.4(5) Å <sup>3</sup>                    |
| Z, Calculated density                  | 2, 1.496 Mg/m <sup>3</sup>                  |
| Absorption coefficient                 | 0.583 mm <sup>-1</sup>                      |
| F(000)                                 | 552                                         |
| Crystal size                           | 0.05 x 0.05 x 0.05 mm                       |
| Theta range for data collection        | 2.185 to 20.062 deg.                        |
| Limiting indices<br>14<=l<=14          | -11<=h<=11, -13<=k<=12, -                   |
| Reflections collected / unique         | 9848 / 3229 [R(int) = 0.0770]               |
| Completeness to theta = 19.665         | 74.7 %                                      |
| Refinement method                      | Full-matrix least-squares on F <sup>2</sup> |
| Data / restraints / parameters         | 3229 / 229 / 296                            |
| Goodness-of-fit on F <sup>2</sup>      | 1.029                                       |
| Final R indices [I>2sigma(I)]          | R1 = 0.0661, wR2 = 0.1493                   |
| R indices (all data)                   | R1 = 0.1143, wR2 = 0.1770                   |
| Largest diff. peak and hole            | 0.600 and -0.390 e.Å <sup>-3</sup>          |

**Table S8.** Atomic coordinates ( $\times 10^4$ ) and equivalent isotropic displacement parameters ( $\text{\AA}^2 \times 10^3$ ) for compound II. U(eq) is defined as one third of the trace of the orthogonalized  $U_{ij}$  tensor.

|        | x         | y        | z        | U(eq)   |
|--------|-----------|----------|----------|---------|
| Mn(01) | 5000      | 5000     | 0        | 35(1)   |
| Mn(02) | 5000      | 5000     | 5000     | 38(1)   |
| Mn(03) | 3605(1)   | 3837(1)  | 2931(1)  | 41(1)   |
| O(1)   | 2007(7)   | 7851(7)  | 2717(6)  | 79(2)   |
| O(2)   | 4779(7)   | 2905(6)  | 779(5)   | 57(2)   |
| O(3)   | 3165(7)   | 2537(6)  | 2137(5)  | 63(2)   |
| O(4)   | 2141(7)   | 3454(7)  | 4232(5)  | 64(2)   |
| O(5)   | 2900(6)   | 4393(6)  | 5366(5)  | 57(2)   |
| O(6)   | 6030(7)   | 2956(6)  | 5266(5)  | 56(2)   |
| O(7)   | 5313(7)   | 2339(6)  | 3890(5)  | 58(2)   |
| O(8)   | 4607(6)   | 5427(5)  | 3211(4)  | 44(1)   |
| O(9)   | 5360(6)   | 5028(6)  | 1693(4)  | 47(1)   |
| O(10)  | 7309(6)   | 4346(6)  | -80(5)   | 52(2)   |
| O(11)  | 7961(6)   | 4530(6)  | -1841(5) | 55(2)   |
| N(1)   | 8971(7)   | 2635(7)  | 2785(6)  | 50(2)   |
| N(2)   | 8425(9)   | 1040(8)  | 2337(7)  | 68(2)   |
| C(1)   | 857(11)   | 3319(11) | 5907(8)  | 70(3)   |
| C(2)   | 2065(10)  | 3755(9)  | 5109(7)  | 48(2)   |
| C(3)   | 6849(13)  | 739(9)   | 5329(9)  | 79(3)   |
| C(4)   | 5989(9)   | 2131(8)  | 4784(7)  | 45(2)   |
| C(5)   | 5870(12)  | 7011(10) | 1936(8)  | 74(3)   |
| C(6)   | 5266(8)   | 5734(8)  | 2290(7)  | 40(2)   |
| C(7)   | 3552(13)  | 1095(10) | 1089(9)  | 81(3)   |
| C(8)   | 3851(10)  | 2268(8)  | 1363(7)  | 48(2)   |
| C(9)   | 8853(11)  | 3909(11) | 2927(10) | 83(3)   |
| C(10)  | 7966(10)  | 2246(9)  | 2366(7)  | 54(2)   |
| C(11)  | 10153(10) | 1635(10) | 3066(9)  | 73(3)   |
| C(12)  | 9814(11)  | 617(11)  | 2806(10) | 80(3)   |
| C(13)  | 8196(9)   | 4150(8)  | -799(7)  | 44(2)   |
| C(14)  | 9697(10)  | 3398(12) | -378(9)  | 88(4)   |
| C(15)  | 7562(16)  | 248(13)  | 2000(15) | 128(5)  |
| C(16)  | 8180(30)  | 40(30)   | 980(20)  | 283(14) |

**Table S9.** Bond lengths [Å] and angles [deg] for *compund\_ii*.

---

|                 |           |
|-----------------|-----------|
| Mn(01)-O(10) #1 | 2.160(5)  |
| Mn(01)-O(10)    | 2.160(5)  |
| Mn(01)-O(2)     | 2.188(6)  |
| Mn(01)-O(2) #1  | 2.188(6)  |
| Mn(01)-O(9)     | 2.195(5)  |
| Mn(01)-O(9) #1  | 2.195(5)  |
| Mn(02)-O(6)     | 2.165(6)  |
| Mn(02)-O(6) #2  | 2.165(6)  |
| Mn(02)-O(5) #2  | 2.166(6)  |
| Mn(02)-O(5)     | 2.166(6)  |
| Mn(02)-O(8)     | 2.185(5)  |
| Mn(02)-O(8) #2  | 2.186(5)  |
| Mn(03)-O(4)     | 2.077(6)  |
| Mn(03)-O(3)     | 2.088(6)  |
| Mn(03)-O(7)     | 2.134(6)  |
| Mn(03)-O(11) #1 | 2.182(6)  |
| Mn(03)-O(8)     | 2.234(5)  |
| Mn(03)-O(9)     | 2.448(6)  |
| O(1)-H(101)     | 0.839(10) |
| O(1)-H(201)     | 0.838(11) |
| O(2)-C(8)       | 1.262(10) |
| O(3)-C(8)       | 1.237(10) |
| O(4)-C(2)       | 1.254(10) |
| O(5)-C(2)       | 1.250(10) |
| O(6)-C(4)       | 1.247(10) |
| O(7)-C(4)       | 1.252(10) |
| O(8)-C(6)       | 1.266(9)  |
| O(9)-C(6)       | 1.234(9)  |
| O(10)-C(13)     | 1.251(9)  |
| O(11)-C(13)     | 1.257(9)  |
| O(11)-Mn(03) #1 | 2.182(6)  |
| N(1)-C(10)      | 1.296(11) |
| N(1)-C(11)      | 1.365(11) |
| N(1)-C(9)       | 1.434(12) |
| N(2)-C(10)      | 1.311(11) |
| N(2)-C(12)      | 1.385(12) |
| N(2)-C(15)      | 1.447(14) |
| C(1)-C(2)       | 1.515(12) |
| C(1)-H(1A)      | 0.9600    |
| C(1)-H(1B)      | 0.9600    |
| C(1)-H(1C)      | 0.9600    |
| C(3)-C(4)       | 1.516(11) |
| C(3)-H(3A)      | 0.9600    |
| C(3)-H(3B)      | 0.9600    |
| C(3)-H(3C)      | 0.9600    |
| C(5)-C(6)       | 1.506(12) |
| C(5)-H(5A)      | 0.9600    |
| C(5)-H(5B)      | 0.9600    |
| C(5)-H(5C)      | 0.9600    |
| C(7)-C(8)       | 1.499(12) |
| C(7)-H(7A)      | 0.9600    |

|                 |            |
|-----------------|------------|
| C (7) -H (7B)   | 0.9600     |
| C (7) -H (7C)   | 0.9600     |
| C (9) -H (9A)   | 0.9600     |
| C (9) -H (9B)   | 0.9600     |
| C (9) -H (9C)   | 0.9600     |
| C (10) -H (10)  | 0.9300     |
| C (11) -C (12)  | 1.343 (14) |
| C (11) -H (11)  | 0.9300     |
| C (12) -H (12)  | 0.9300     |
| C (13) -C (14)  | 1.509 (12) |
| C (14) -H (14A) | 0.9600     |
| C (14) -H (14B) | 0.9600     |
| C (14) -H (14C) | 0.9600     |
| C (15) -C (16)  | 1.46 (2)   |
| C (15) -H (15A) | 0.9700     |
| C (15) -H (15B) | 0.9700     |
| C (16) -H (16A) | 0.9600     |
| C (16) -H (16B) | 0.9600     |
| C (16) -H (16C) | 0.9600     |

|                             |           |
|-----------------------------|-----------|
| O (10) #1-Mn (01) -O (10)   | 180.0     |
| O (10) #1-Mn (01) -O (2)    | 91.6 (2)  |
| O (10) -Mn (01) -O (2)      | 88.4 (2)  |
| O (10) #1-Mn (01) -O (2) #1 | 88.4 (2)  |
| O (10) -Mn (01) -O (2) #1   | 91.6 (2)  |
| O (2) -Mn (01) -O (2) #1    | 180.0     |
| O (10) #1-Mn (01) -O (9)    | 91.7 (2)  |
| O (10) -Mn (01) -O (9)      | 88.3 (2)  |
| O (2) -Mn (01) -O (9)       | 87.7 (2)  |
| O (2) #1-Mn (01) -O (9)     | 92.3 (2)  |
| O (10) #1-Mn (01) -O (9) #1 | 88.3 (2)  |
| O (10) -Mn (01) -O (9) #1   | 91.7 (2)  |
| O (2) -Mn (01) -O (9) #1    | 92.3 (2)  |
| O (2) #1-Mn (01) -O (9) #1  | 87.7 (2)  |
| O (9) -Mn (01) -O (9) #1    | 180.0     |
| O (6) -Mn (02) -O (6) #2    | 180.0 (3) |
| O (6) -Mn (02) -O (5) #2    | 89.4 (2)  |
| O (6) #2-Mn (02) -O (5) #2  | 90.6 (2)  |
| O (6) -Mn (02) -O (5)       | 90.6 (2)  |
| O (6) #2-Mn (02) -O (5)     | 89.4 (2)  |
| O (5) #2-Mn (02) -O (5)     | 180.0     |
| O (6) -Mn (02) -O (8)       | 93.1 (2)  |
| O (6) #2-Mn (02) -O (8)     | 86.9 (2)  |
| O (5) #2-Mn (02) -O (8)     | 90.1 (2)  |
| O (5) -Mn (02) -O (8)       | 89.9 (2)  |
| O (6) -Mn (02) -O (8) #2    | 86.9 (2)  |
| O (6) #2-Mn (02) -O (8) #2  | 93.1 (2)  |
| O (5) #2-Mn (02) -O (8) #2  | 89.9 (2)  |
| O (5) -Mn (02) -O (8) #2    | 90.1 (2)  |
| O (8) -Mn (02) -O (8) #2    | 180.0     |
| O (4) -Mn (03) -O (3)       | 99.9 (3)  |
| O (4) -Mn (03) -O (7)       | 93.6 (3)  |
| O (3) -Mn (03) -O (7)       | 90.0 (3)  |
| O (4) -Mn (03) -O (11) #1   | 92.1 (2)  |

|                            |            |
|----------------------------|------------|
| O (3) -Mn (03) -O (11) #1  | 91.4 (2)   |
| O (7) -Mn (03) -O (11) #1  | 173.8 (2)  |
| O (4) -Mn (03) -O (8)      | 101.9 (2)  |
| O (3) -Mn (03) -O (8)      | 158.1 (2)  |
| O (7) -Mn (03) -O (8)      | 90.6 (2)   |
| O (11) #1-Mn (03) -O (8)   | 85.9 (2)   |
| O (4) -Mn (03) -O (9)      | 156.5 (2)  |
| O (3) -Mn (03) -O (9)      | 103.1 (2)  |
| O (7) -Mn (03) -O (9)      | 91.1 (2)   |
| O (11) #1-Mn (03) -O (9)   | 82.8 (2)   |
| O (8) -Mn (03) -O (9)      | 55.03 (19) |
| H (101) -O (1) -H (201)    | 107 (3)    |
| C (8) -O (2) -Mn (01)      | 136.7 (6)  |
| C (8) -O (3) -Mn (03)      | 126.8 (6)  |
| C (2) -O (4) -Mn (03)      | 129.9 (6)  |
| C (2) -O (5) -Mn (02)      | 142.7 (6)  |
| C (4) -O (6) -Mn (02)      | 135.4 (5)  |
| C (4) -O (7) -Mn (03)      | 135.2 (6)  |
| C (6) -O (8) -Mn (02)      | 140.0 (5)  |
| C (6) -O (8) -Mn (03)      | 96.2 (5)   |
| Mn (02) -O (8) -Mn (03)    | 111.0 (2)  |
| C (6) -O (9) -Mn (01)      | 145.2 (5)  |
| C (6) -O (9) -Mn (03)      | 87.1 (5)   |
| Mn (01) -O (9) -Mn (03)    | 107.7 (2)  |
| C (13) -O (10) -Mn (01)    | 137.4 (5)  |
| C (13) -O (11) -Mn (03) #1 | 131.1 (6)  |
| C (10) -N (1) -C (11)      | 108.8 (9)  |
| C (10) -N (1) -C (9)       | 125.3 (8)  |
| C (11) -N (1) -C (9)       | 125.8 (8)  |
| C (10) -N (2) -C (12)      | 107.5 (9)  |
| C (10) -N (2) -C (15)      | 125.5 (9)  |
| C (12) -N (2) -C (15)      | 126.6 (9)  |
| C (2) -C (1) -H (1A)       | 109.5      |
| C (2) -C (1) -H (1B)       | 109.5      |
| H (1A) -C (1) -H (1B)      | 109.5      |
| C (2) -C (1) -H (1C)       | 109.5      |
| H (1A) -C (1) -H (1C)      | 109.5      |
| H (1B) -C (1) -H (1C)      | 109.5      |
| O (5) -C (2) -O (4)        | 125.0 (8)  |
| O (5) -C (2) -C (1)        | 117.9 (9)  |
| O (4) -C (2) -C (1)        | 117.1 (8)  |
| C (4) -C (3) -H (3A)       | 109.5      |
| C (4) -C (3) -H (3B)       | 109.5      |
| H (3A) -C (3) -H (3B)      | 109.5      |
| C (4) -C (3) -H (3C)       | 109.5      |
| H (3A) -C (3) -H (3C)      | 109.5      |
| H (3B) -C (3) -H (3C)      | 109.5      |
| O (6) -C (4) -O (7)        | 126.5 (8)  |
| O (6) -C (4) -C (3)        | 116.9 (8)  |
| O (7) -C (4) -C (3)        | 116.6 (8)  |
| C (6) -C (5) -H (5A)       | 109.5      |
| C (6) -C (5) -H (5B)       | 109.5      |
| H (5A) -C (5) -H (5B)      | 109.5      |
| C (6) -C (5) -H (5C)       | 109.5      |

|                          |            |
|--------------------------|------------|
| H (5A) -C (5) -H (5C)    | 109.5      |
| H (5B) -C (5) -H (5C)    | 109.5      |
| O (9) -C (6) -O (8)      | 120.5 (8)  |
| O (9) -C (6) -C (5)      | 121.9 (8)  |
| O (8) -C (6) -C (5)      | 117.5 (8)  |
| C (8) -C (7) -H (7A)     | 109.5      |
| C (8) -C (7) -H (7B)     | 109.5      |
| H (7A) -C (7) -H (7B)    | 109.5      |
| C (8) -C (7) -H (7C)     | 109.5      |
| H (7A) -C (7) -H (7C)    | 109.5      |
| H (7B) -C (7) -H (7C)    | 109.5      |
| O (3) -C (8) -O (2)      | 125.4 (8)  |
| O (3) -C (8) -C (7)      | 117.5 (8)  |
| O (2) -C (8) -C (7)      | 117.1 (8)  |
| N (1) -C (9) -H (9A)     | 109.5      |
| N (1) -C (9) -H (9B)     | 109.5      |
| H (9A) -C (9) -H (9B)    | 109.5      |
| N (1) -C (9) -H (9C)     | 109.5      |
| H (9A) -C (9) -H (9C)    | 109.5      |
| H (9B) -C (9) -H (9C)    | 109.5      |
| N (1) -C (10) -N (2)     | 110.1 (8)  |
| N (1) -C (10) -H (10)    | 124.9      |
| N (2) -C (10) -H (10)    | 124.9      |
| C (12) -C (11) -N (1)    | 106.9 (9)  |
| C (12) -C (11) -H (11)   | 126.6      |
| N (1) -C (11) -H (11)    | 126.6      |
| C (11) -C (12) -N (2)    | 106.7 (9)  |
| C (11) -C (12) -H (12)   | 126.7      |
| N (2) -C (12) -H (12)    | 126.7      |
| O (10) -C (13) -O (11)   | 126.2 (8)  |
| O (10) -C (13) -C (14)   | 117.0 (8)  |
| O (11) -C (13) -C (14)   | 116.8 (8)  |
| C (13) -C (14) -H (14A)  | 109.5      |
| C (13) -C (14) -H (14B)  | 109.5      |
| H (14A) -C (14) -H (14B) | 109.5      |
| C (13) -C (14) -H (14C)  | 109.5      |
| H (14A) -C (14) -H (14C) | 109.5      |
| H (14B) -C (14) -H (14C) | 109.5      |
| N (2) -C (15) -C (16)    | 108.1 (15) |
| N (2) -C (15) -H (15A)   | 110.1      |
| C (16) -C (15) -H (15A)  | 110.1      |
| N (2) -C (15) -H (15B)   | 110.1      |
| C (16) -C (15) -H (15B)  | 110.1      |
| H (15A) -C (15) -H (15B) | 108.4      |
| C (15) -C (16) -H (16A)  | 109.5      |
| C (15) -C (16) -H (16B)  | 109.5      |
| H (16A) -C (16) -H (16B) | 109.5      |
| C (15) -C (16) -H (16C)  | 109.5      |
| H (16A) -C (16) -H (16C) | 109.5      |
| H (16B) -C (16) -H (16C) | 109.5      |

---

Symmetry transformations used to generate equivalent atoms:

#1 -x+1,-y+1,-z      #2 -x+1,-y+1,-z+1

**Table S10.** Anisotropic displacement parameters ( $\text{\AA}^2 \times 10^3$ ) for compound II.

The anisotropic displacement factor exponent takes the form:  
 $-2 \pi^2 [ h^2 a^2 U_{11} + \dots + 2 h k a^* b^* U_{12} ]$

|         | U11     | U22     | U33     | U23      | U13     | U12    |
|---------|---------|---------|---------|----------|---------|--------|
| Mn(01)  | 37(1)   | 39(1)   | 27(1)   | -11(1)   | -2(1)   | -2(1)  |
| Mn(02)  | 45(1)   | 43(1)   | 26(1)   | -13(1)   | -2(1)   | -6(1)  |
| Mn(03)  | 44(1)   | 47(1)   | 34(1)   | -15(1)   | -2(1)   | -9(1)  |
| O(1)    | 67(5)   | 74(5)   | 89(5)   | -26(4)   | -13(4)  | 10(4)  |
| O(2)    | 58(4)   | 44(3)   | 62(4)   | -8(3)    | 1(3)    | -8(3)  |
| O(3)    | 82(5)   | 73(4)   | 50(4)   | -32(3)   | 5(3)    | -33(4) |
| O(4)    | 63(4)   | 90(5)   | 49(4)   | -30(3)   | 11(3)   | -31(3) |
| O(5)    | 52(4)   | 74(4)   | 53(4)   | -29(3)   | 8(3)    | -17(3) |
| O(6)    | 67(4)   | 44(3)   | 53(4)   | -18(3)   | -12(3)  | 4(3)   |
| O(7)    | 70(4)   | 52(3)   | 46(3)   | -16(3)   | -19(3)  | 9(3)   |
| O(8)    | 56(4)   | 50(3)   | 26(3)   | -11(2)   | -2(2)   | -12(3) |
| O(9)    | 44(3)   | 64(4)   | 36(3)   | -22(3)   | -3(2)   | -5(3)  |
| O(10)   | 36(3)   | 69(4)   | 44(3)   | -17(3)   | -2(3)   | 8(3)   |
| O(11)   | 48(4)   | 74(4)   | 39(3)   | -22(3)   | -5(3)   | 5(3)   |
| N(1)    | 36(4)   | 48(4)   | 55(4)   | -6(4)    | -6(3)   | 0(3)   |
| N(2)    | 56(5)   | 49(5)   | 89(6)   | -16(4)   | -20(4)  | 4(4)   |
| C(1)    | 68(7)   | 82(7)   | 54(6)   | -15(5)   | 19(5)   | -20(5) |
| C(2)    | 53(5)   | 51(5)   | 37(4)   | -7(4)    | -3(4)   | -16(4) |
| C(3)    | 111(9)  | 43(5)   | 72(7)   | -15(5)   | -36(6)  | 17(5)  |
| C(4)    | 44(5)   | 39(4)   | 44(5)   | -10(4)   | -2(4)   | 2(4)   |
| C(5)    | 92(8)   | 82(7)   | 56(6)   | -16(5)   | 7(6)    | -49(6) |
| C(6)    | 29(4)   | 54(5)   | 34(4)   | -15(4)   | -8(3)   | -3(4)  |
| C(7)    | 127(10) | 70(7)   | 65(7)   | -36(6)   | 15(7)   | -45(7) |
| C(8)    | 60(6)   | 45(5)   | 38(5)   | -10(4)   | -6(4)   | -14(4) |
| C(9)    | 68(7)   | 79(7)   | 115(9)  | -52(7)   | -5(7)   | -7(6)  |
| C(10)   | 46(5)   | 53(5)   | 50(5)   | -3(4)    | -11(4)  | 0(4)   |
| C(11)   | 34(5)   | 69(6)   | 101(8)  | -16(6)   | -19(5)  | 5(4)   |
| C(12)   | 55(6)   | 53(6)   | 111(9)  | -7(6)    | -22(6)  | 8(5)   |
| C(13)   | 44(5)   | 42(5)   | 44(5)   | -13(4)   | -7(4)   | 2(4)   |
| C(14)   | 46(6)   | 132(10) | 63(7)   | -22(7)   | -5(5)   | 23(6)  |
| C(15)   | 110(10) | 85(8)   | 194(14) | -59(10)  | -80(10) | 11(8)  |
| C(16)   | 310(30) | 370(30) | 320(30) | -260(30) | 10(20)  | -      |
| 150(30) |         |         |         |          |         |        |
